# Supplementary material for: Differential Microbial Assemblages Associated with Shikonin-producing Borage Species in Two Distinct Soil Types
Source: Research Square preprint supplement (doi:10.21203/rs.3.rs-233342/v1), 2021-02-24
Supplement: Supplementary file 1 [file e51a6d8283edccd2e748fbf0.docx]

**Differential microbial assemblages associated with shikonin-producing Borage species in two distinct soil types**

Aliya Fazal1¶, Minkai Yang1¶, Zhongling Wen1¶, Farman Ali1, Ran Ren1, Chenyu Hao1, Xingyu Chen1, Jiangyan Fu1, Xuan Wang1, Wencai Jie1, Tongming Yin2, Guihua Lu1,2,3*, Jinliang Qi1,2*, Yonghua Yang1,2*

1 State Key Laboratory of Pharmaceutical Biotechnology, Institute for Plant Molecular Biology, School of Life Sciences, Nanjing University, Nanjing 210023, China.

2 Co-Innovation Center for Sustainable Forestry in Southern China, Nanjing Forestry University, Nanjing 210037, China.

3 School of Life Sciences, Huaiyin Normal University, No.111 Changjiang west road, Huaian, 223300, P. R. China.

¶ These authors contributed equally to this work.

* **Corresponding author**

Yonghua Yang

Email: yangyh@nju.edu.cn

Tel (Fax): 86-25-89686305


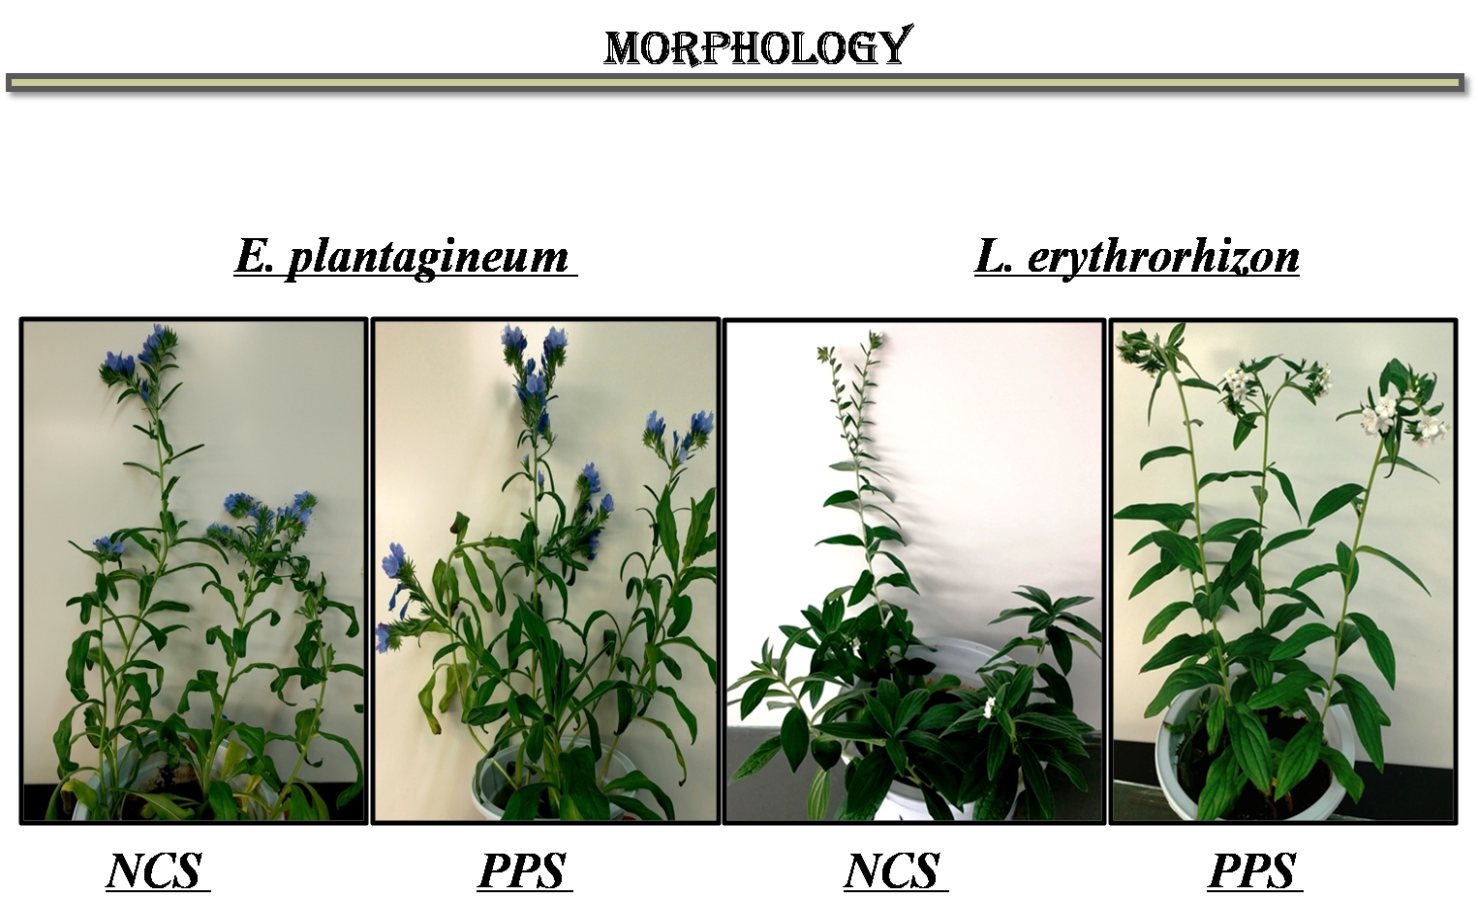


**Fig. S1** Representative Growth phenotypes of two inter-genera *E. plantagineum* (EP) and *L. erythrorhizon* (LE). Photographs taken at almost 18 weeks after planting. NCS and PPS represent Natural campus soil and Peat potting artificial soil correspondingly


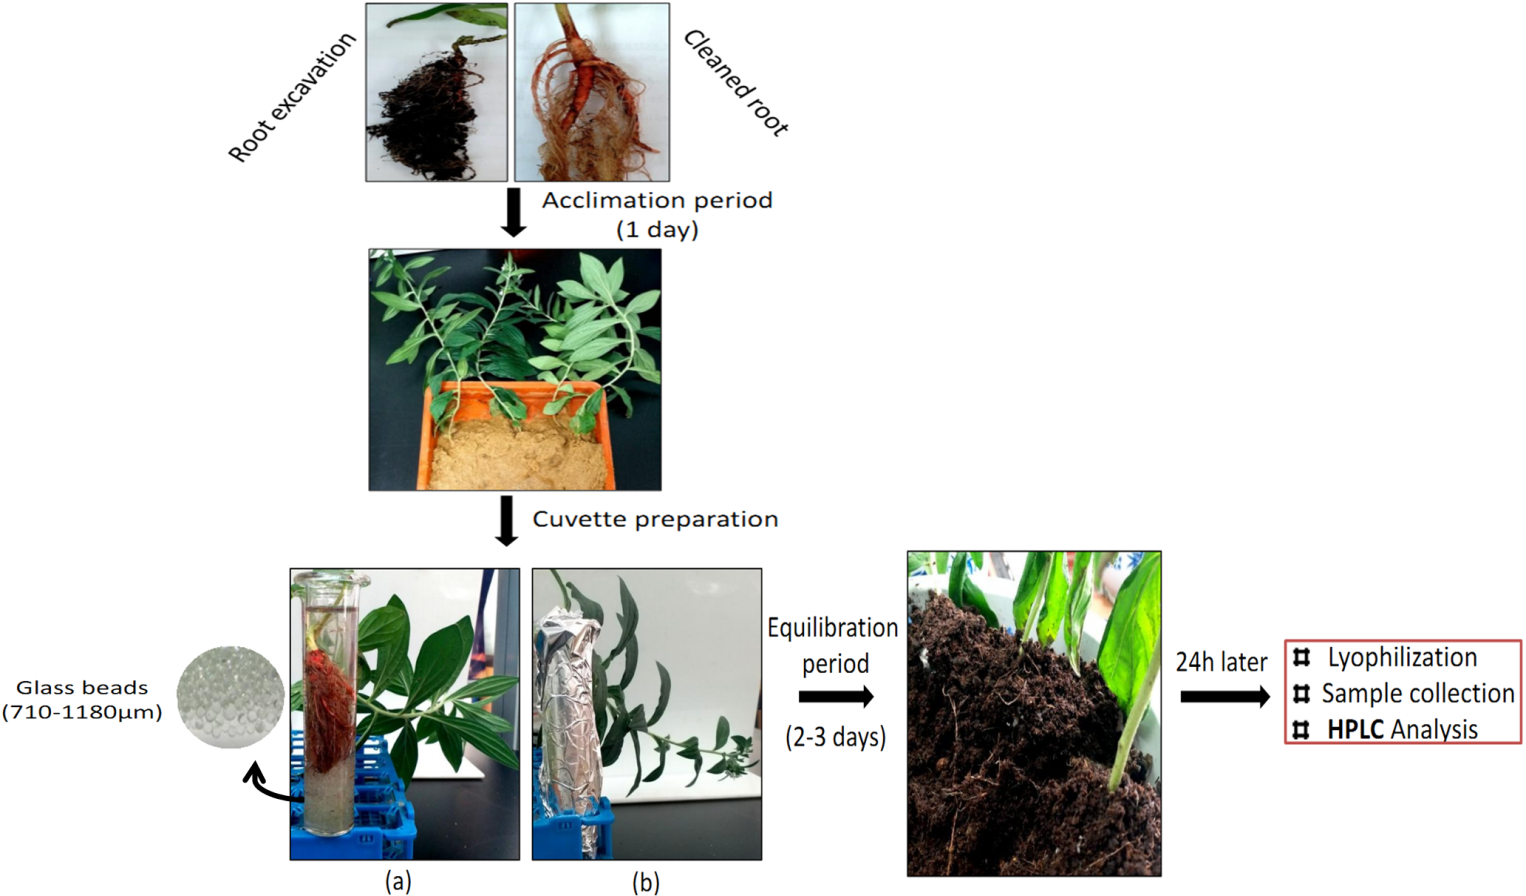


**Fig. S2** Diagrammatic representation of an experimental system designed for capturing root exudates from intact *E. plantagineum* (EP) and *L. erythrorhizon* (LE) roots grown in two different soil types


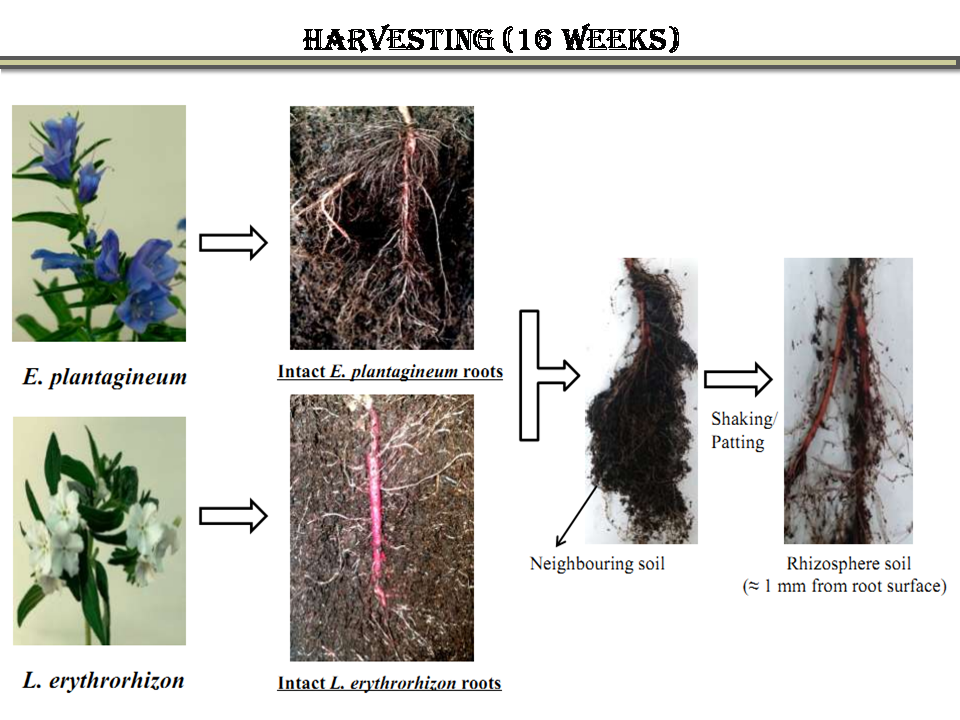


**Fig. S3** Both the *E. plantagineum* (EP) and *L. erythrorhizon* (LE) plants were harvested post 18 weeks of cultivation for rhizosphere soil (RS) sampling.


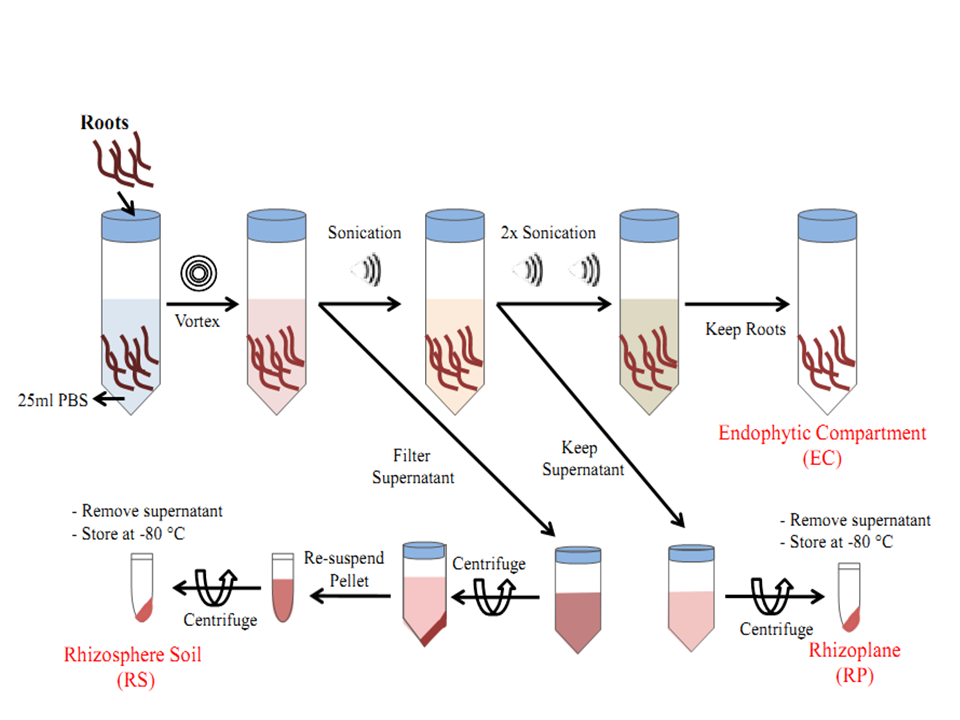


**Fig. S4** Rhizosphere (RS), rhizoplane (RP) and endosphere/endophytic compartment (EC) soil sampling. Adopted from Edwards *et al.* PNAS, 2015

**
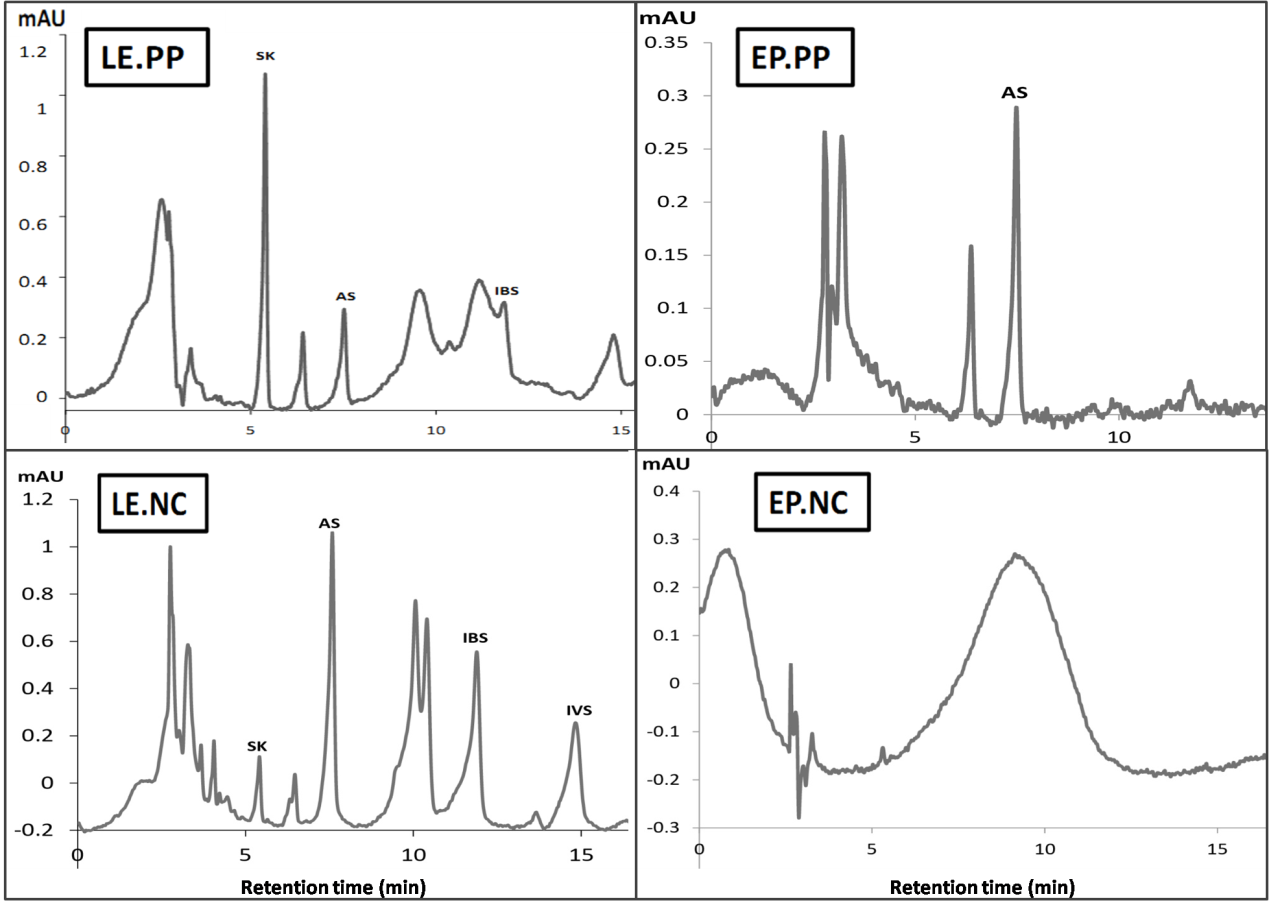
**

**Fig. S5** Chromatograms via HPLC Agilent 1200 Series, of root exudates samples obtained for *E. plantagineum* (EP) and *L. erythrorhizon* (LE) plants grown in Peat potting artificial (PP), and Natural campus soil (NC). Each sample is labeled by a four-letter code, e.g. LE.PP stands for *L. erythrorhizon* species grown in Peat potting artificial soil. Resulting peaks corresponded to shikonin (SK), acetylshikonin (AS); isobutyrylshikonin (IBS); and isovalerylshikonin (IVS). No chromatogram was observed for EP grown in NC soil which could possibly be due to sampling error

**

**

**Fig. S6** Total relative abundances of 6 dominant phyla in different rhizo-compartments as well as bulk soil samples of *E. plantagineum* and *L. erythrorhizon*.


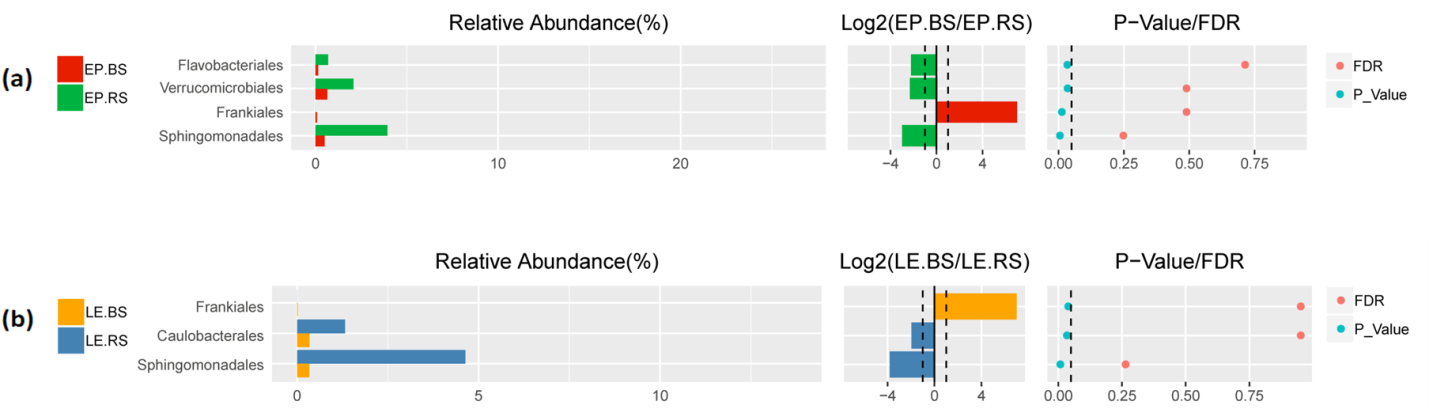


**Fig.S7** Relative abundance of differentially abundant microbes in the rhizosphere compartments of **(a)** EP; **(b)** LE compared to bulk soil control at orders level

**
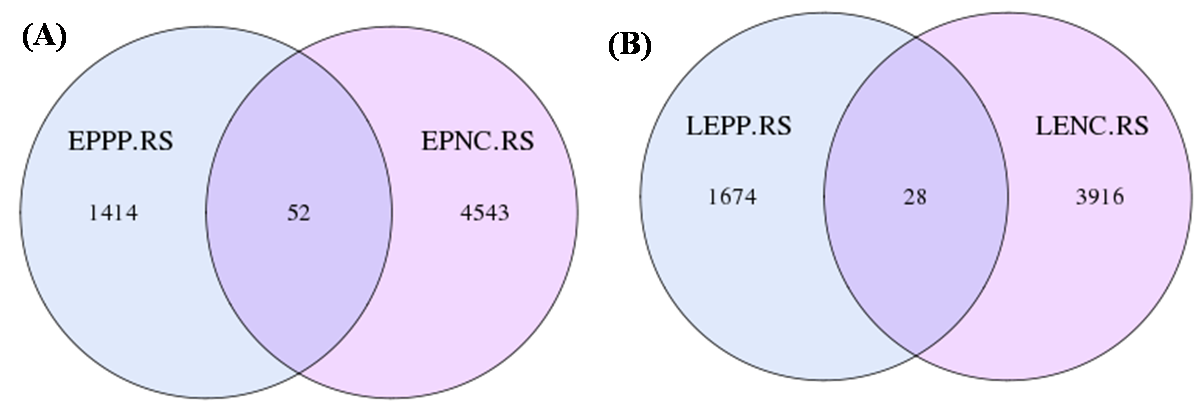
**

**Fig. S8** Venn diagram showing differentially abundant OTUs in Rhizosphere (RS) compartment of (A) *E. plantagineum* (EP), (B) *L. erythrorhizon* (LE) grown in natural campus (NC) and peat potting artificial (PP) soil


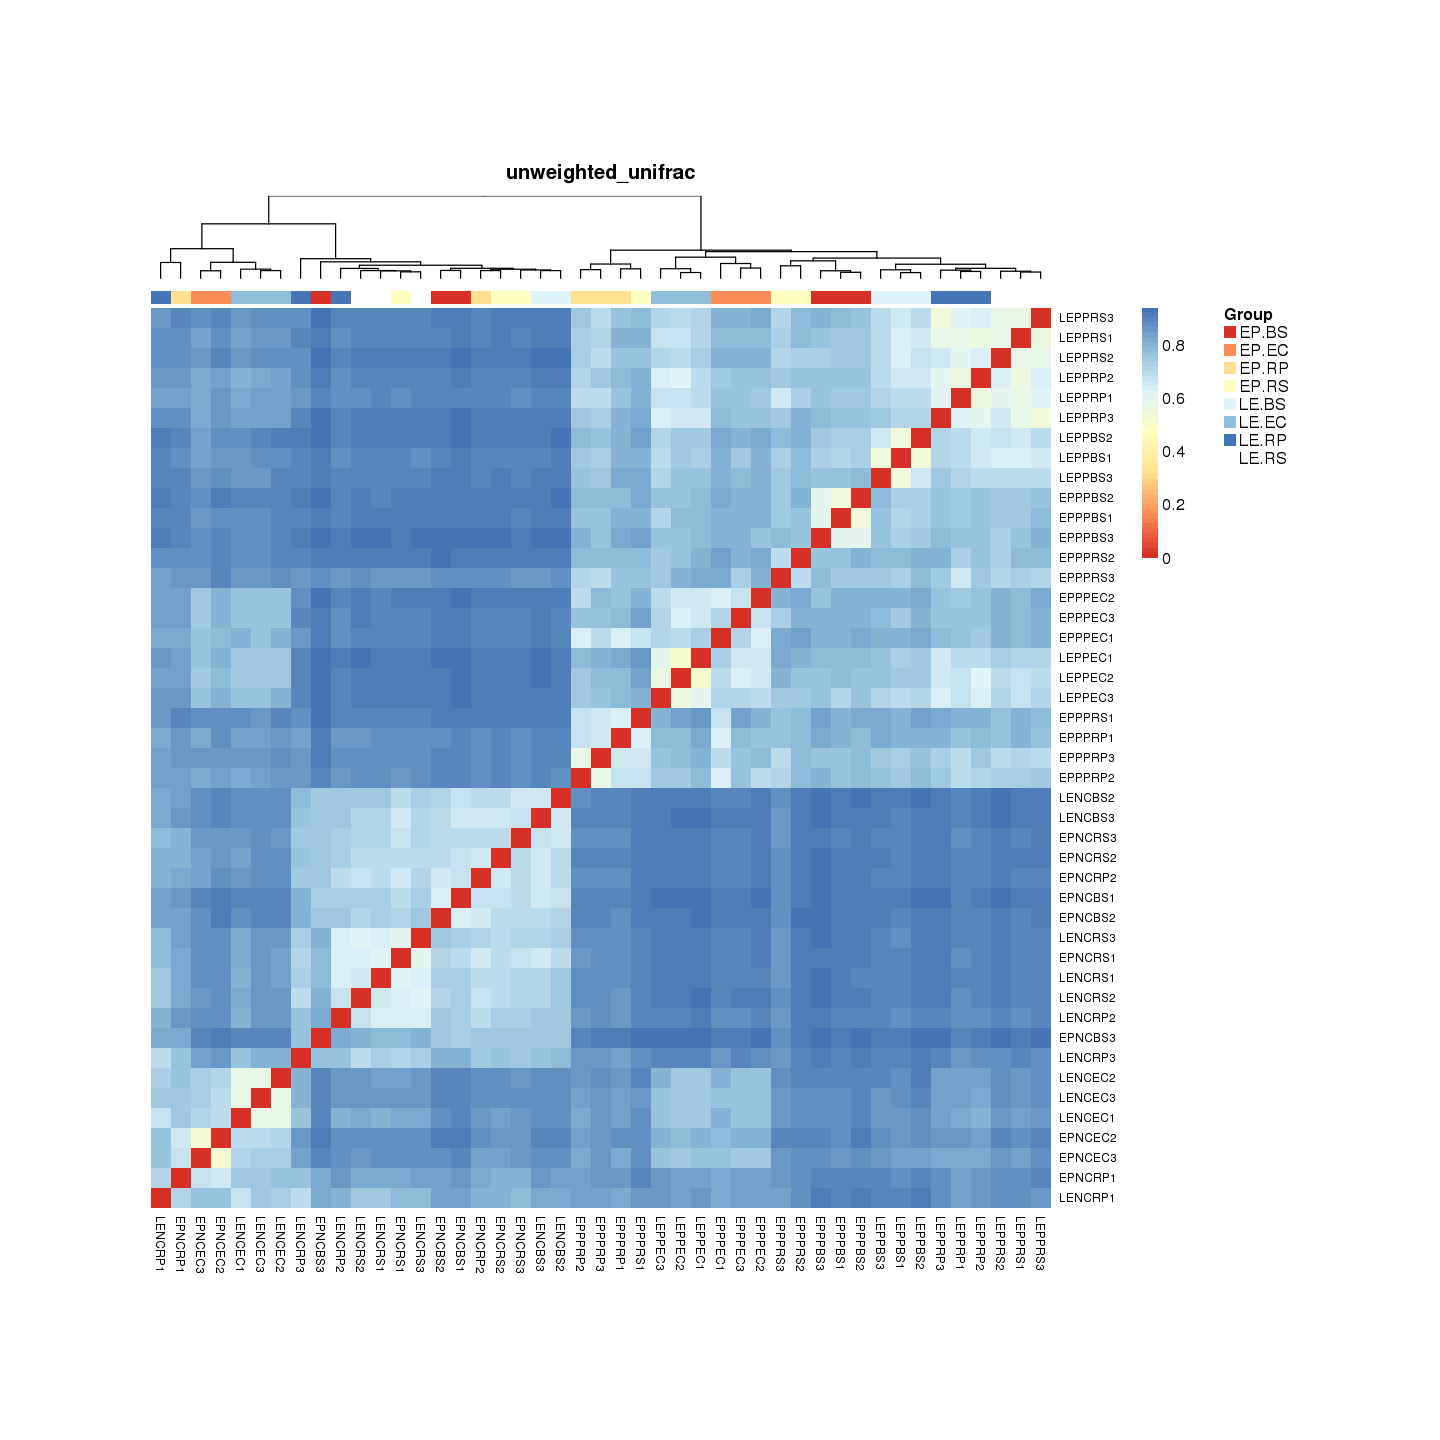


**Fig. S9** Heatmap based on unweighted Unifrac distance (UUF) metric of *E. plantagineum* (EP), and *L. erythrorhizon* (LE) samples grown in Natural campus (NC), and Peat potting artificial (PP) soil. Three rhizo-compartments i.e. endosphere/endophytic compartment (EC), rhizoplane (RP), rhizosphere (RS), and bulk soil (BS). Each sample is labeled by a six-letter code, such as EPPPEC stands for endophytic compartment of *E. plantagineum* species grown in Peat potting artificial soil


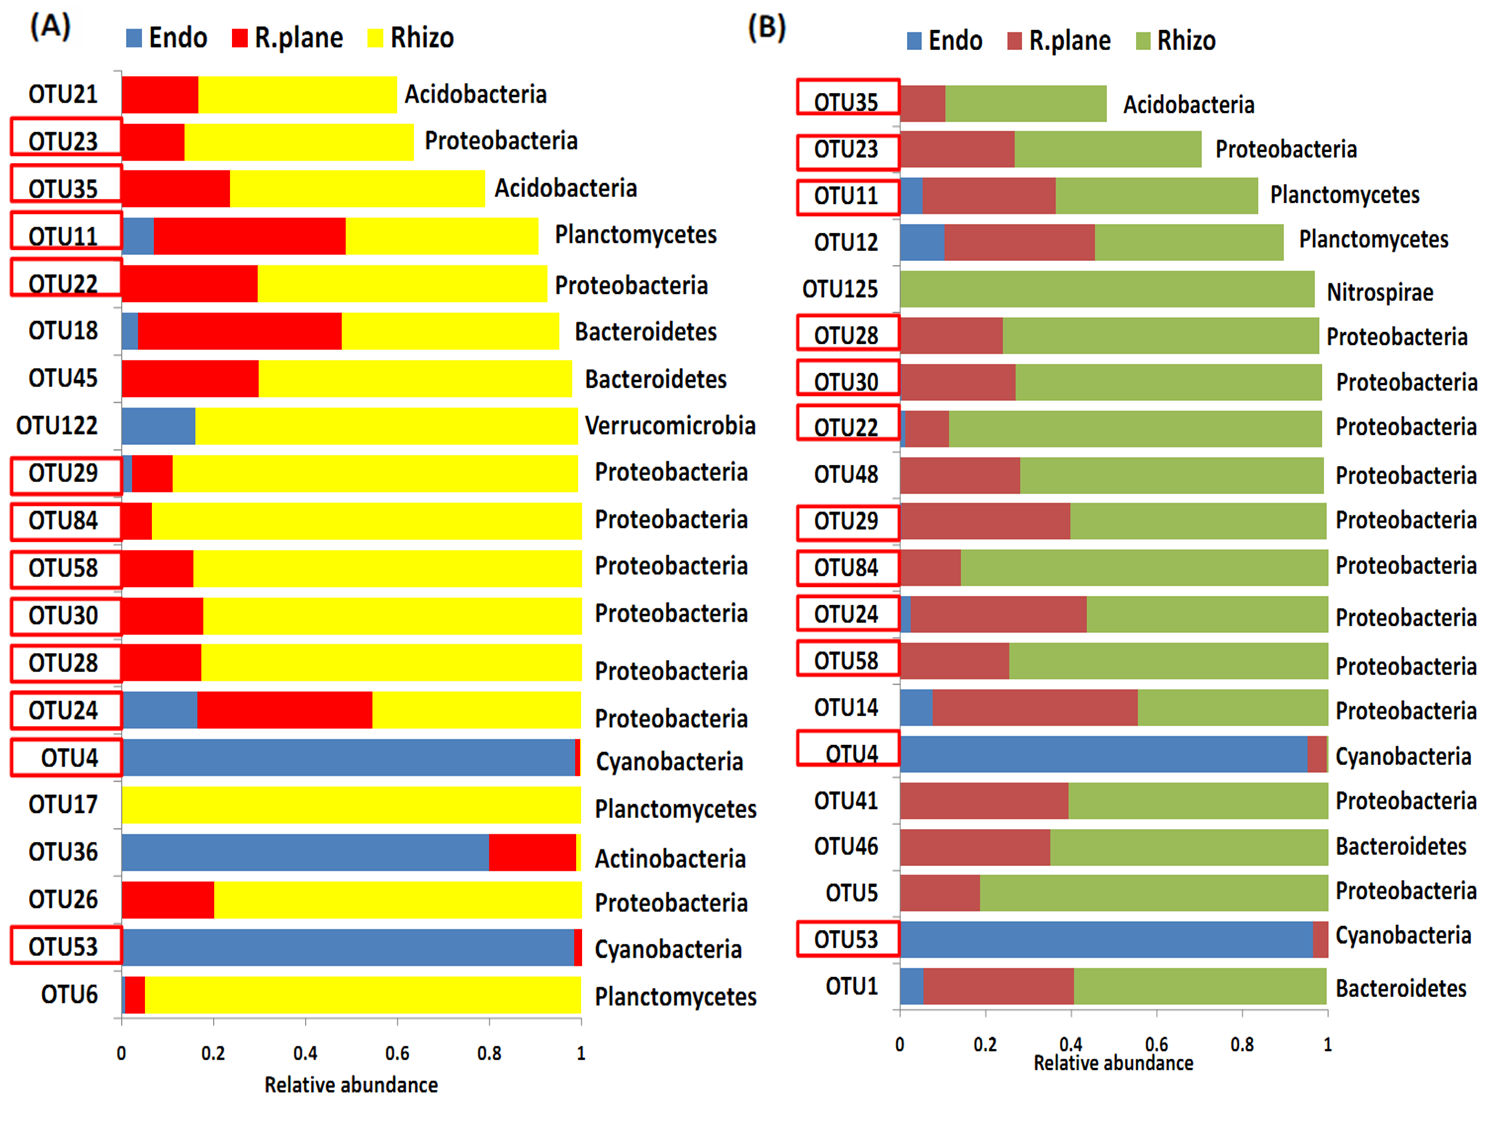


**Fig. S10** Cumulative histogram showing distribution of top 20 OTUs in 3 rhizo-compartments of **(A)** *E. plantagineum* ; **(B)** *L. erythrorhizon* along with their phylum level phylogenetic relatedness. Red rectangle represents mutually shared OTUs among both EP and LE rhizo-compartments. X-axis shows relative abundance, Y-axis shows top 20 differentially enriched OTUs


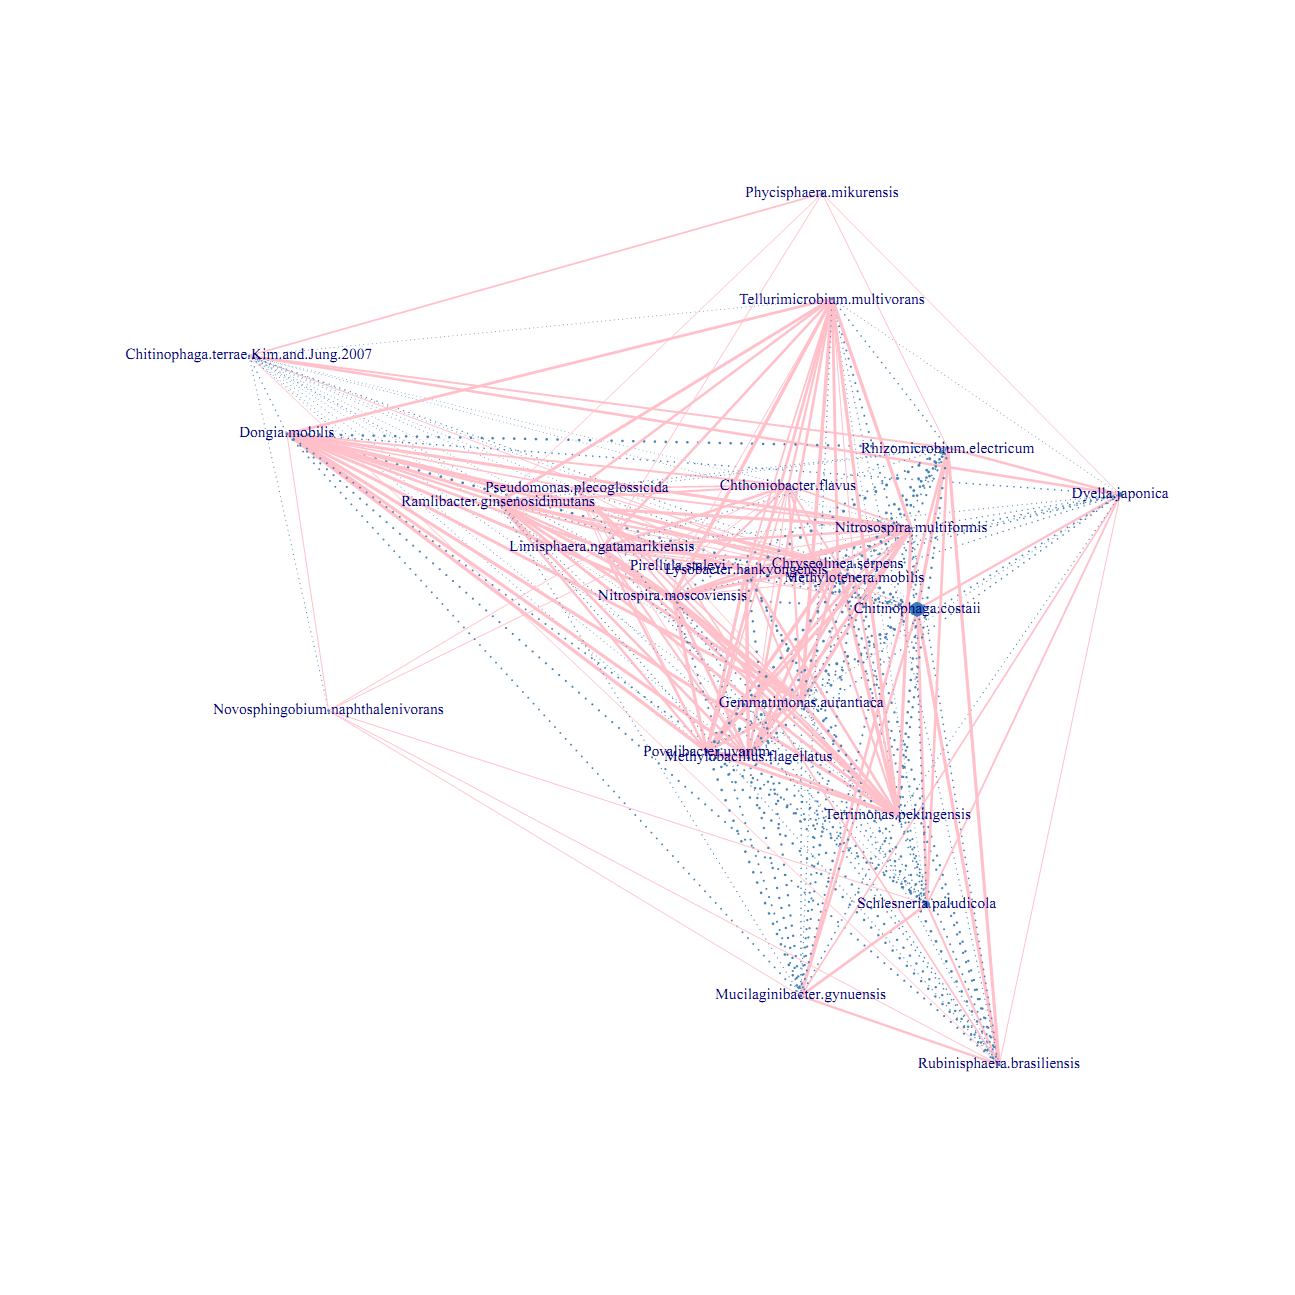


**Fig. S11** Cytoscape showing correlation between species from visual perspective.Each node represents a species, and the node size represents the relative abundance of that species. Edges represent co-relation, thicker the edge, stronger the correlation. Pink edge represents a positive correlation while blue edge represents a negative correlation


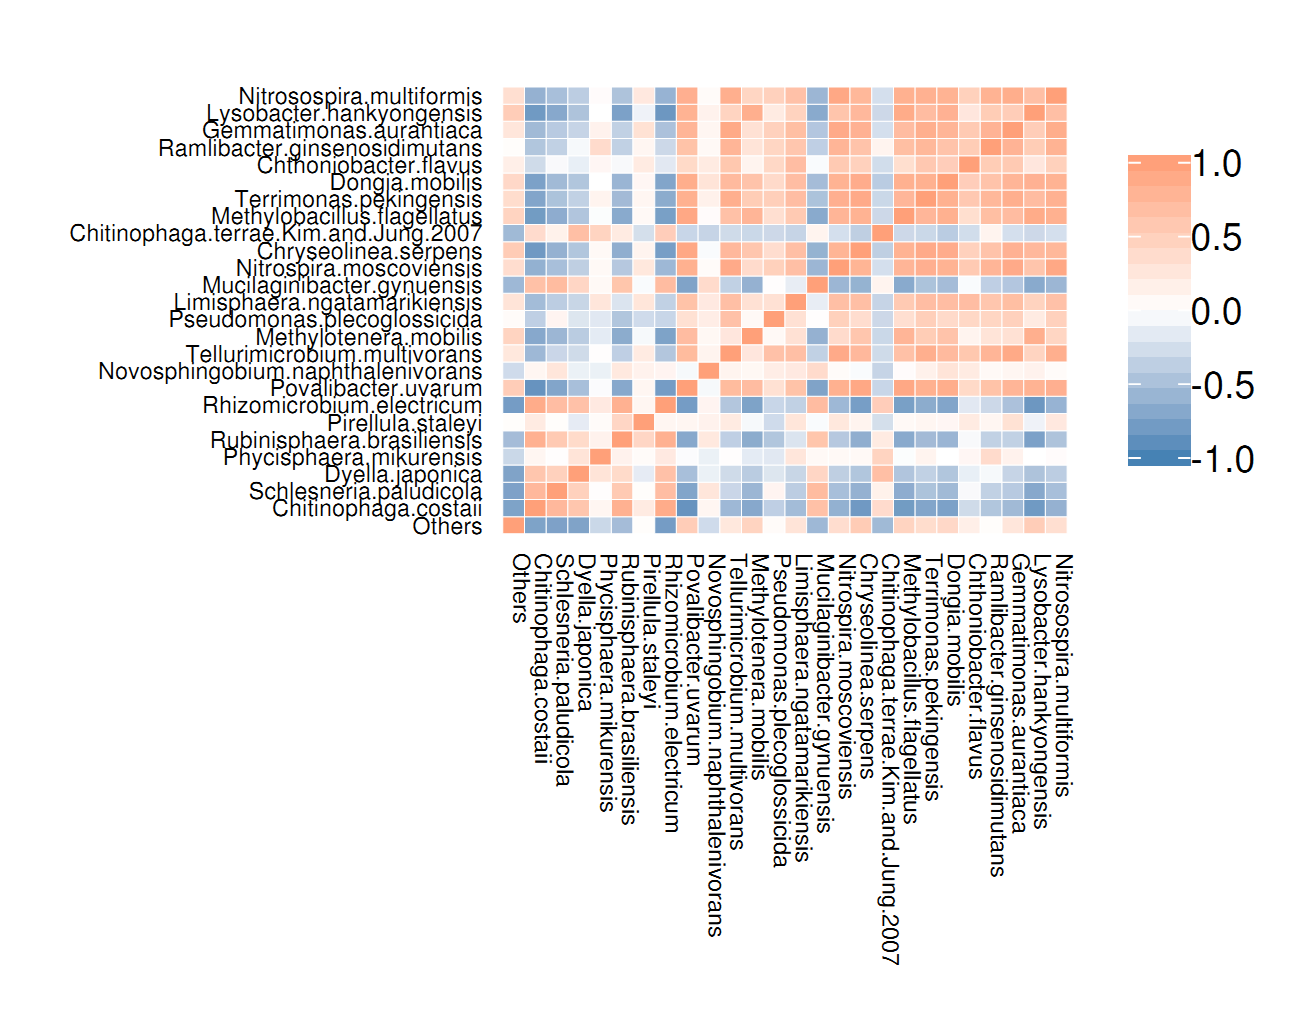


**Fig. S12** Heatmap showing positively and negatively co-related OTUs in 3 rhizo-compartments of *E. plantagineum* and *L. erythrorhizon*. Blue shows negative co-relation, red shows positive co-relation. This figure only shows the relationship between the species with correlation coefficient greater than 0.2
